# Supplementary material for: Immunogenicity and Cross-Protective Efficacy Induced by Outer Membrane Proteins from Salmonella Typhimurium Mutants with Truncated LPS in Mice
Source: PubMed Central journal article supplement (PMC4813267; doi:10.3390/ijms17030416), 2016-03-22
Supplement: ijms-17-00416-s001.pdf [file ijms-17-00416-s001.pdf]

# Supplementary Materials: Immunogenicity and Cross-Protective Efficacy Induced by Outer Membrane Proteins from *Salmonella* Typhimurium Mutants with Truncated LPS in Mice

Qiong Liu, Qing Liu, Xinxin Zhao, Tian Liu, Jie Yi, Kang Liang and Qingke Kong

Table S1. Primers used in this study.

| Primers | Sequences (5'-3')                      | Function                                                       |
|---------|----------------------------------------|----------------------------------------------------------------|
| rfaC-1F | TGGCGGCGCTGAATAGCGAG                   | For deletion of <i>waaC</i> ( <i>rfaC</i> ) by suicide plasmid |
| rfaC-1R | CTCTTTACCTGCAGGTTAAACGCCCTCTTCCGACAAC  |                                                                |
| rfaC-2F | GTTTAAACCTGCAGGTAAAGAGACTCTGTCTCATCCCA |                                                                |
| rfaC-2R | TAAGAAGCCCTCCAGTACCG                   |                                                                |
| rfaF-1F | GAATACACAGTTAAACAACGG                  | For deletion of <i>waaF</i> ( <i>rfaF</i> ) by suicide plasmid |
| rfaF-1R | CCCTCTCCTGCAGGACTTACGCGTCGGTTCAGC      |                                                                |
| rfaF-2F | GTAAGTCCTGCAGGAGAGGGCGTTTAATGCGGGTT    |                                                                |
| rfaF-2R | TTTATCCCATGCGCCAGACG                   |                                                                |
